# Supplementary material for: The Tsallis generalized entropy enhances the interpretation of transcriptomics datasets
Source: PubMed Central journal article supplement (PMC9022844; doi:10.1371/journal.pone.0266618), 2022-04-21
Supplement: pone.0266618.s002.pdf [file pone.0266618.s002.pdf]

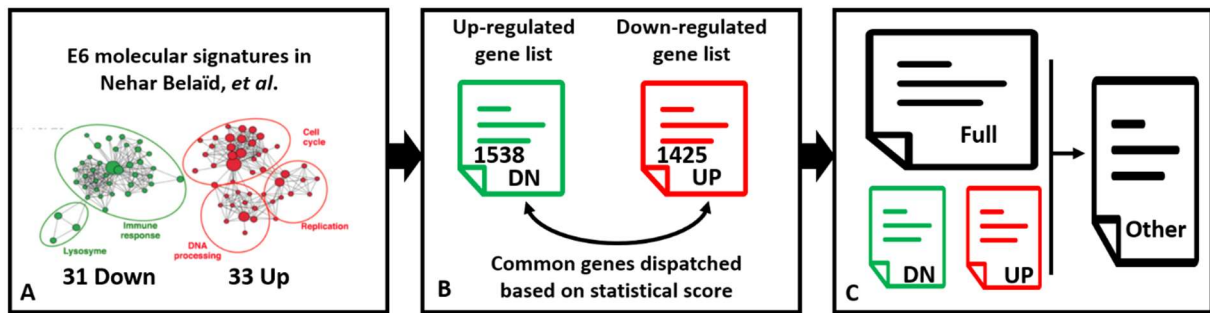

**S2 Fig. E6 data subset creation.** A: Genes are extracted from day 6 regulated molecular signatures from (Nehar-Belaïd et al. 2016). B: Genes belonging to both 33 *UP* and 31 *DN* gene lists are dispatched based on their eBayes score calculated by comparing gene expression at day 6 to Controls (NP). C: The *OTHER* subset is created by removing *UP* and *DN* subset from the full dataset. Similarly, genes from the 81 down- and 42 up-regulated signatures at day 12 were extracted to build the *DN* (685 genes), *UP* (752 genes) and *OTHER* (10,938 genes) gene lists.
