# Supplementary material for: The Tsallis generalized entropy enhances the interpretation of transcriptomics datasets
Source: PubMed Central journal article supplement (PMC9022844; doi:10.1371/journal.pone.0266618), 2022-04-21
Supplement: pone.0266618.s003.pdf [file pone.0266618.s003.pdf]

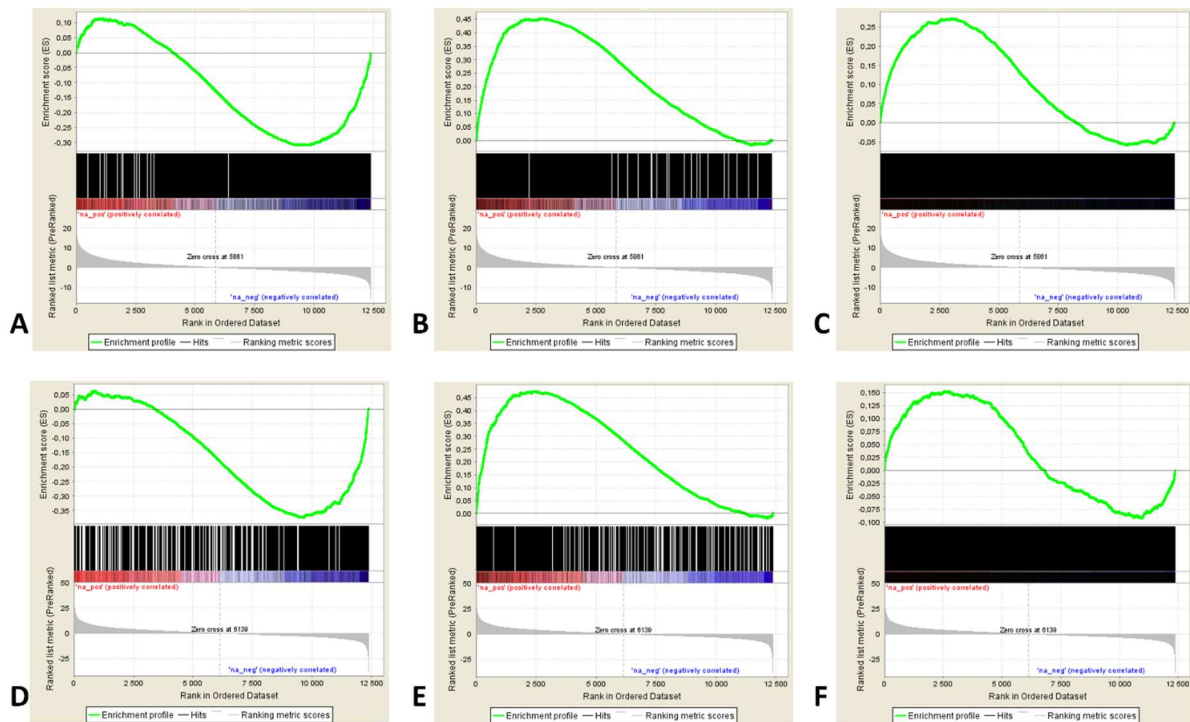

**S3 Fig. Enrichment analysis of day 6 and 12 compared to NP *DN*, *UP* and *OTHER* subsets.** GSEA analysis provided statistical analysis of gene expression biases in the *DN* (A, D), *UP* (B, E) and *OTHER* (C, F) subsets constructed as described in S2 Fig. and Material and Methods section. A, E: *DN* subset shows significant enrichment for down-regulated genes ( $q\text{-value} < 10^{-7}$ ). B, E: *UP* subset shows significant enrichment for up-regulated genes ( $q\text{-value} < 10^{-7}$ ). C, F: *OTHER* subset shows no enrichment ( $q\text{-value} > 0.05$ ).
