# Supplementary material for: The Tsallis generalized entropy enhances the interpretation of transcriptomics datasets
Source: PubMed Central journal article supplement (PMC9022844; doi:10.1371/journal.pone.0266618), 2022-04-21
Supplement: pone.0266618.s004.pdf [file pone.0266618.s004.pdf]

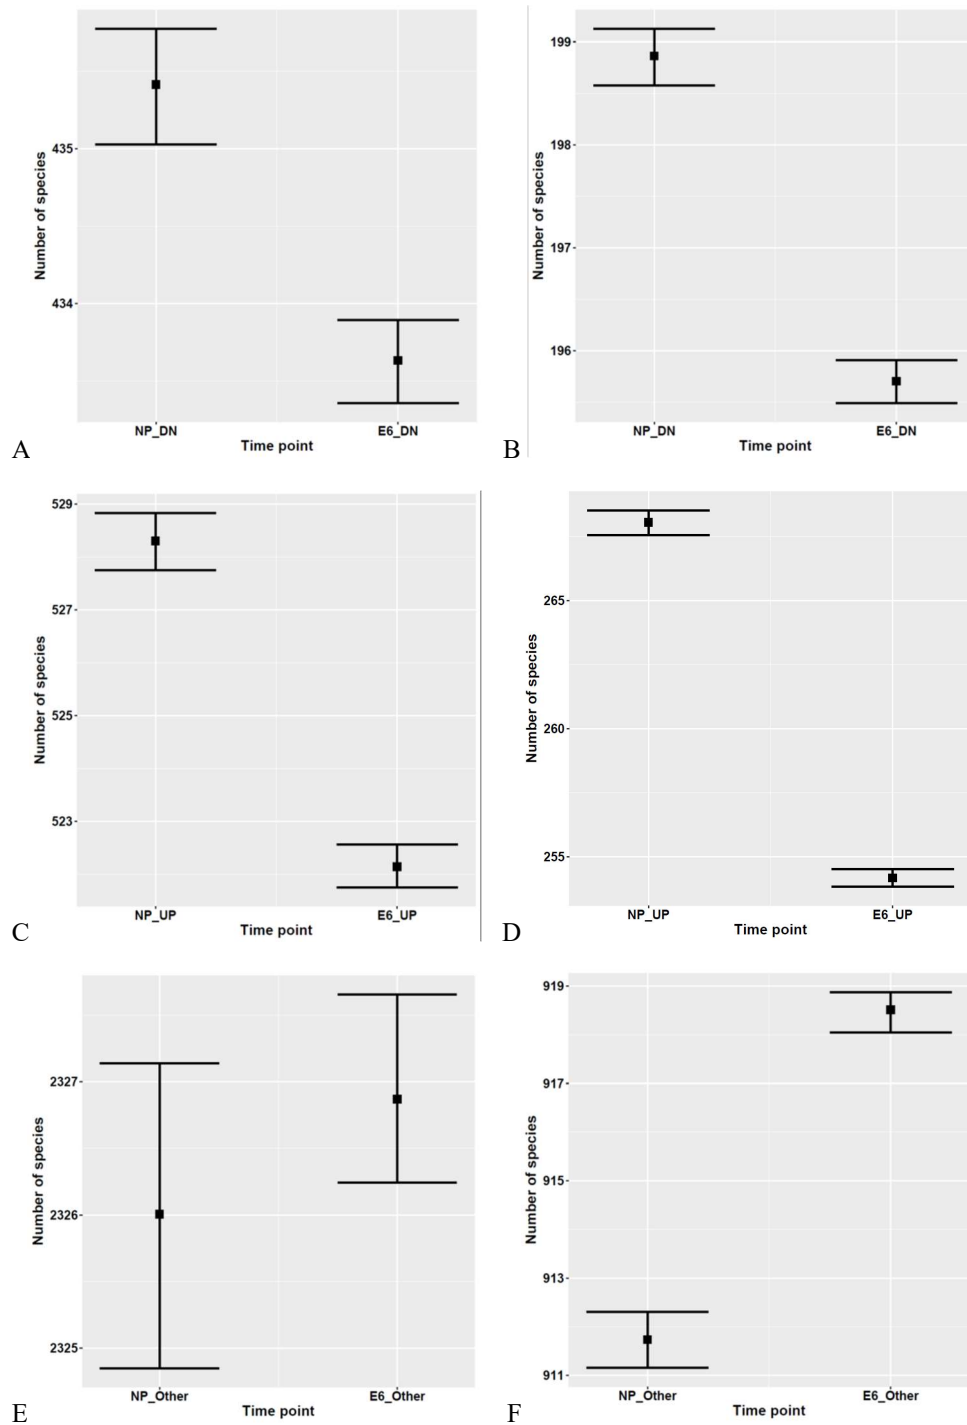

**S4 Fig. Alpha diversity analysis of day 6/NP DN, UP and OTHER subsets.** For each subset, Shannon (A, C and E) and Simpson (B, D and F) alpha diversity were calculated as the average of alpha diversities of individual profiles for the 6/NP DN (A and B), UP (C and D) and OTHER (E and F) subsets. Bars represent the 95% bootstrap confidence interval calculated from 100 iterations where profiles are simulated from a multinomial distribution following the observed transcript frequencies.
