# Supplementary material for: The Tsallis generalized entropy enhances the interpretation of transcriptomics datasets
Source: PubMed Central journal article supplement (PMC9022844; doi:10.1371/journal.pone.0266618), 2022-04-21

## Tsallis entropy of order $q$

$${}^q D_{\beta} = e_q^{\frac{{}^q H_{\beta}}{1-(q-1){}^q H_{\alpha}}}$$

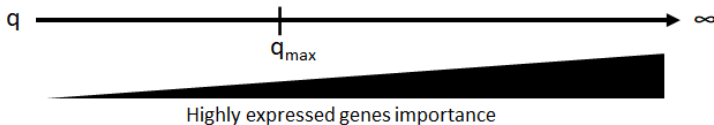

beta-Diversity maximisation  
& Data reduction at  $q_{\max}$

Transcriptomic  
analysis

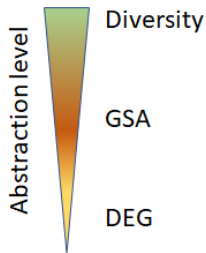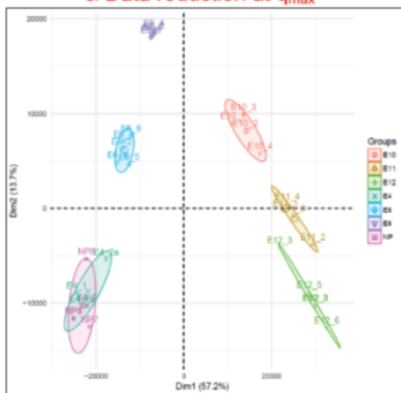

Supplement: pone.0266618.s006.pdf [file pone.0266618.s006.pdf]
